# Supplementary material
Source: MDPI journal article supplement (https://www.mdpi.com/2304-6740/10/4/55)
Supplement: s1 [file s1]

# Supramolecular Frameworks and a Luminescent Coordination Polymer from New $\beta$ -Diketone/Tetrazole Ligands

Delia Blasi, Pierluigi Mercandelli, Lucia Carlucci\*

Dipartimento di Chimica, Università degli Studi di Milano, via Camillo Golgi 19, 20133, Milano, Italy

## Supporting information

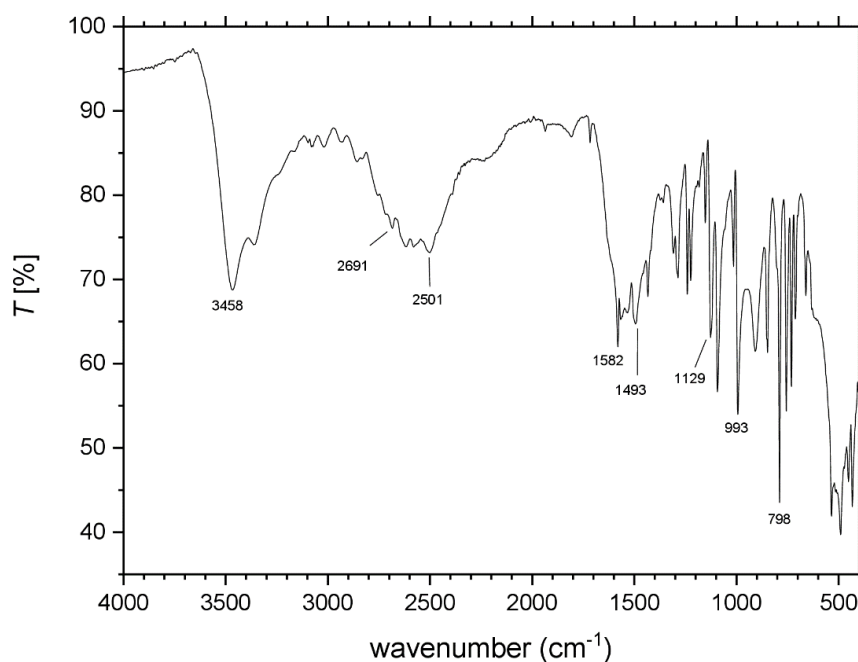

**Figure S1.** FT-IR spectrum of  $H_3L^1$  acquired in ATR mode.

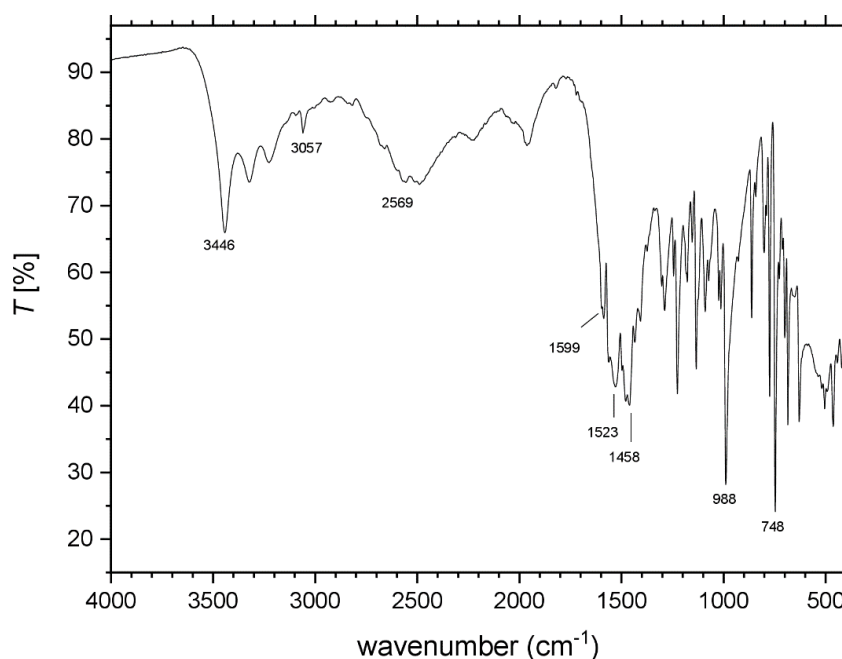

**Figure S2.** FT-IR spectra of  $H_2L^2$  acquired in ATR mode.

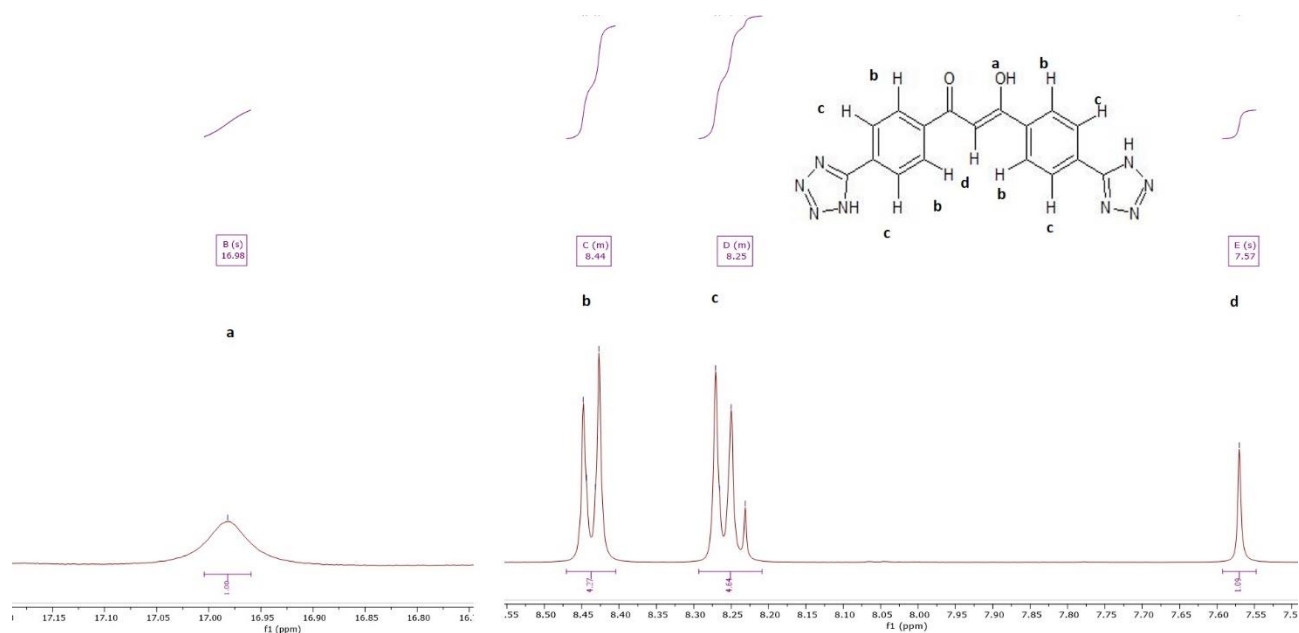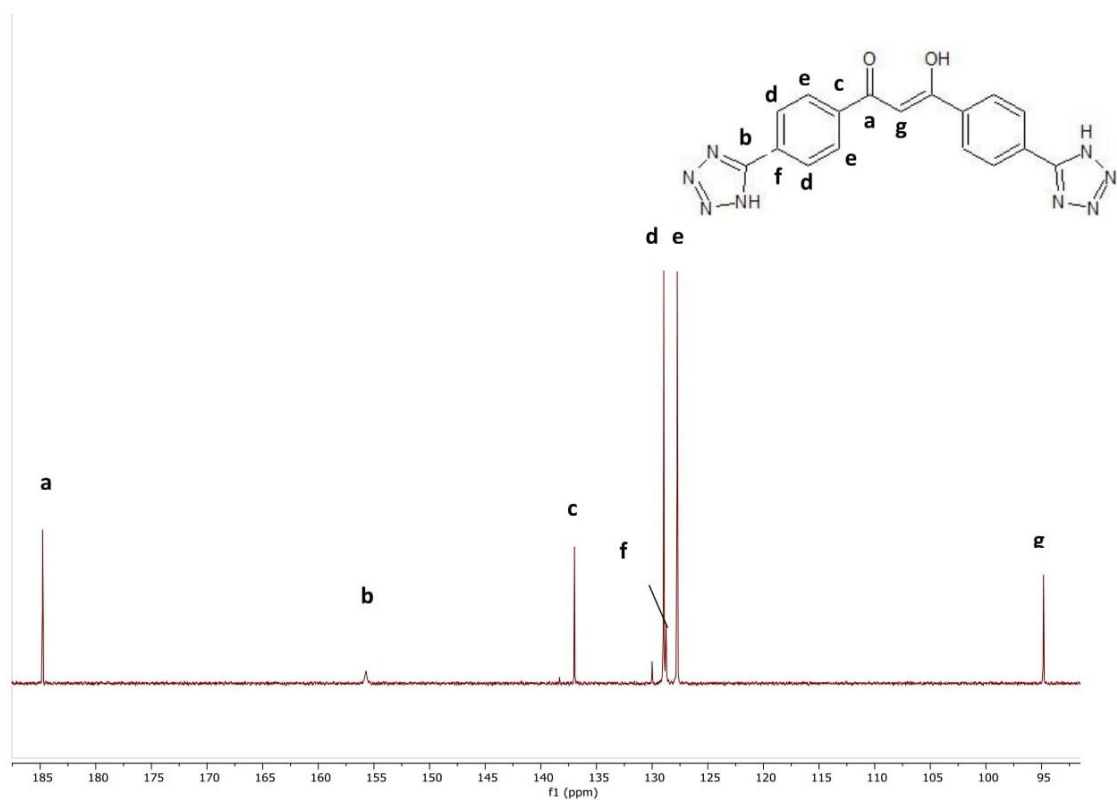

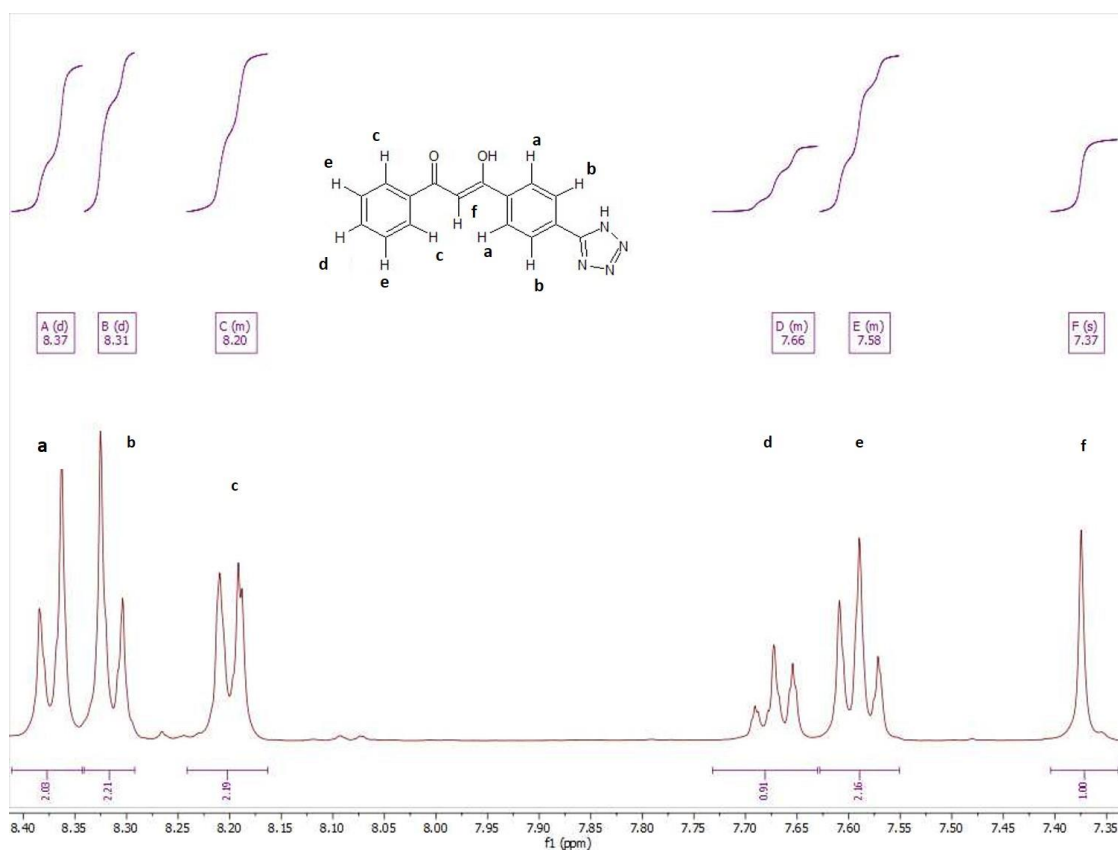

**Figure S5.**  $^1H$  NMR for  $H_2L^2$  (acetone- $d_6$ , 300 K, 9.4 T).

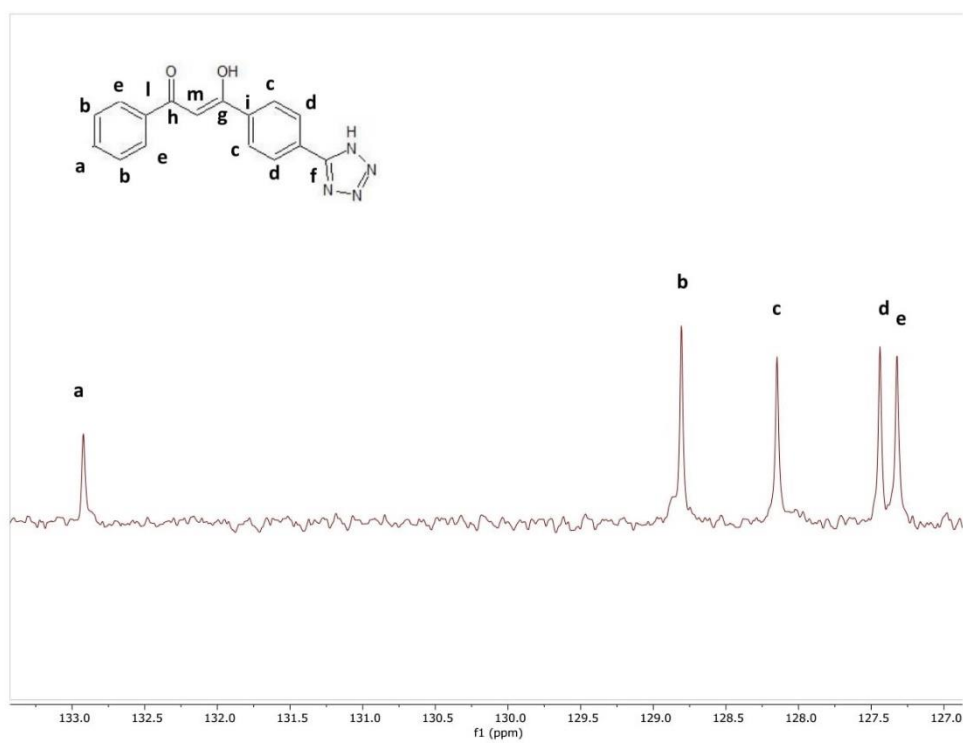

**Figure S6.**  $^{13}C\{^1H\}$  NMR for  $H_2L^2$  (acetone- $d_6$ , 300 K, 9.4 T).

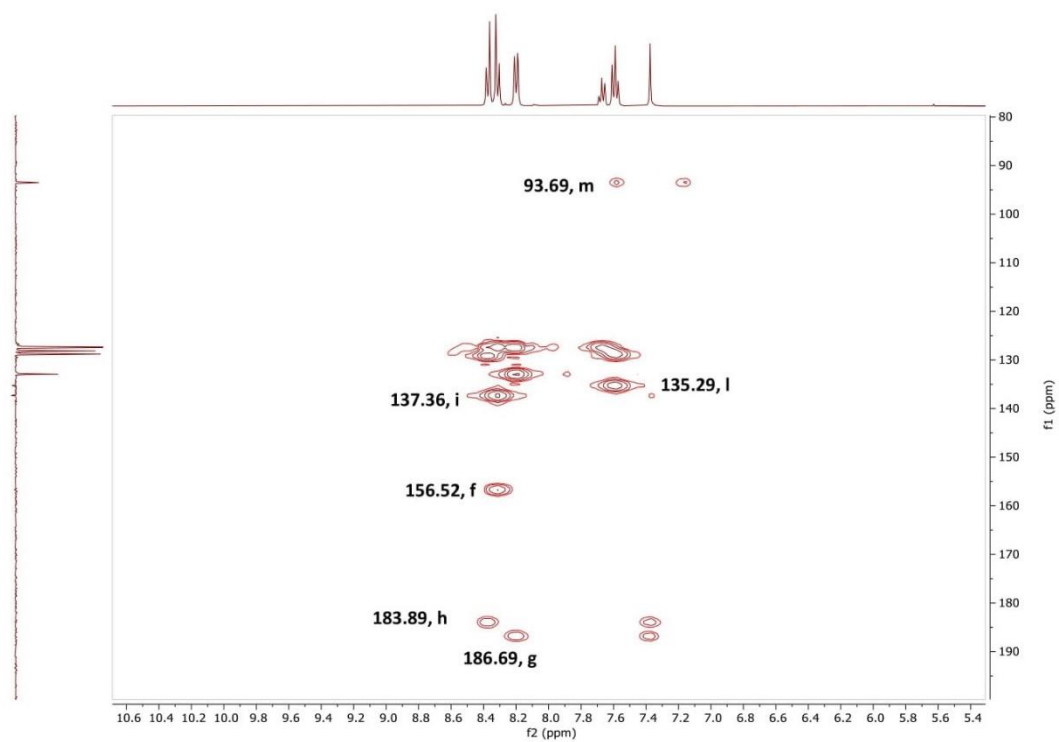

**Figure S7.** 2D  $^1\text{H}$ - $^{13}\text{C}$  NMR heteronuclear scalar correlation experiment for  $\text{H}_2\text{L}^2$  (acetone- $\text{d}_6$ , 300 K, 9.4 T).

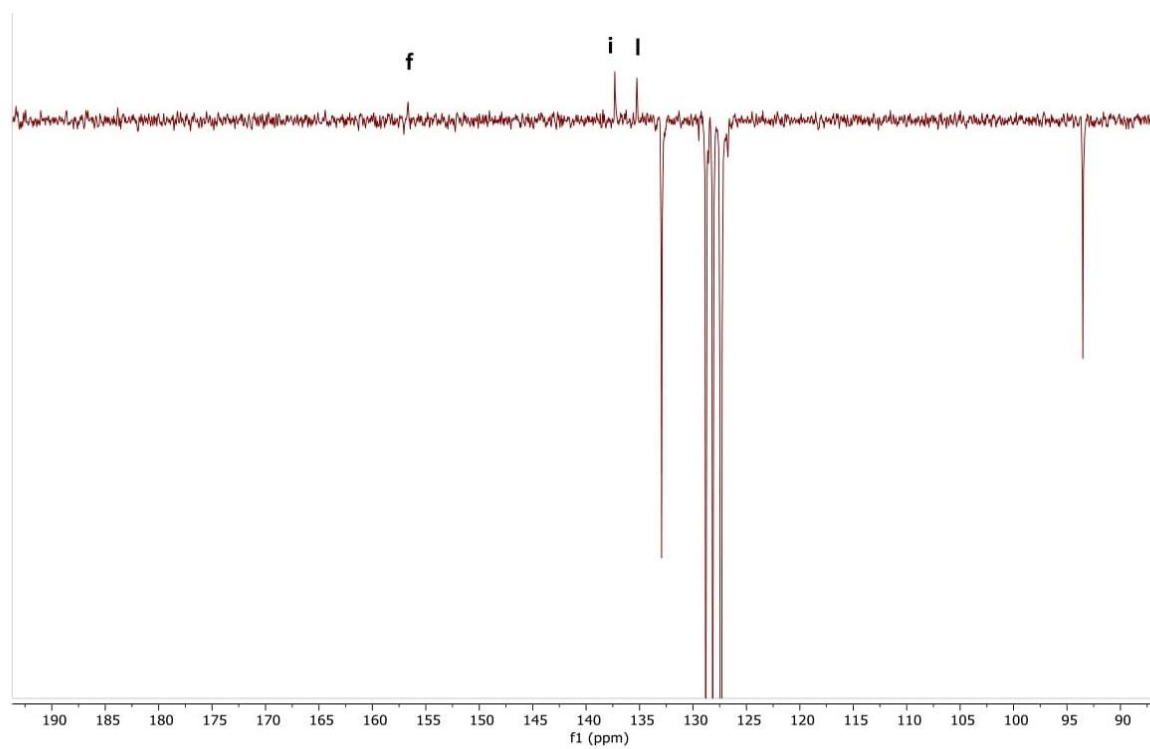

**Figure S8.**  $^{13}\text{C}\{^1\text{H}\}$  APT NMR for  $\text{H}_2\text{L}^2$  (acetone- $\text{d}_6$ , 300 K, 9.4 T).

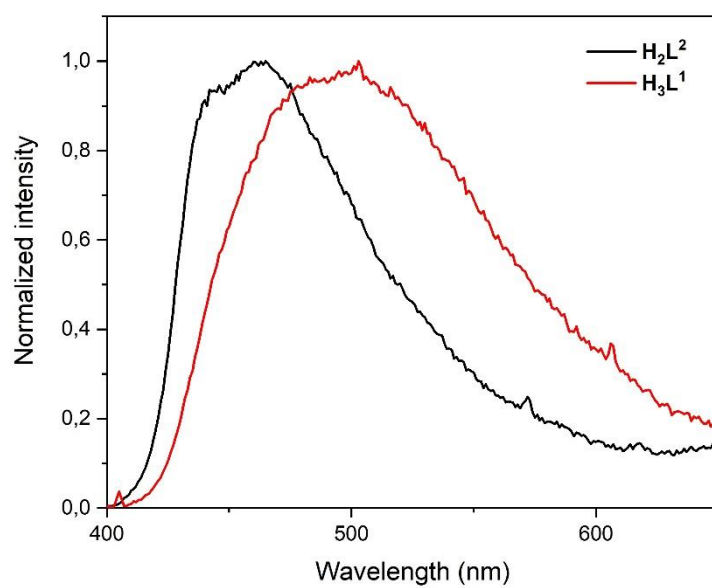

**Figure S9.** Emission spectra of  $H_3L^1$  and  $H_2L^2$  in the solid state ( $\lambda_{exc} = 370$  nm).

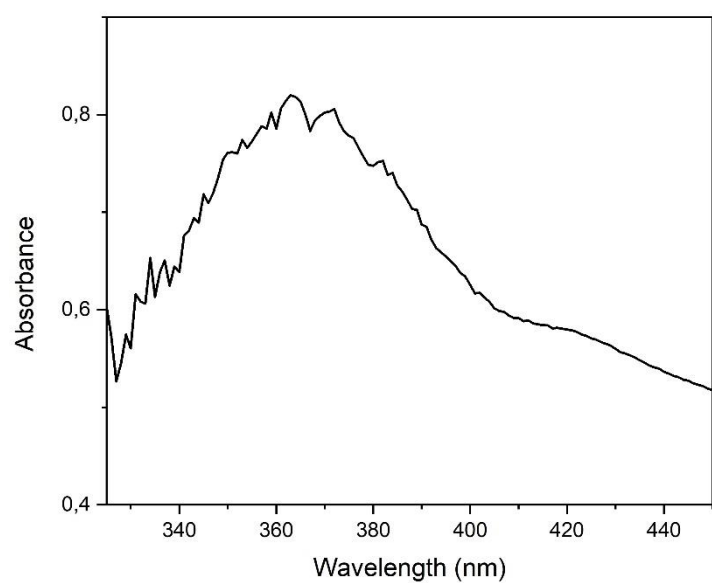

**Figure S10.** Absorption spectrum of a suspension of **2** exfoliated in water.

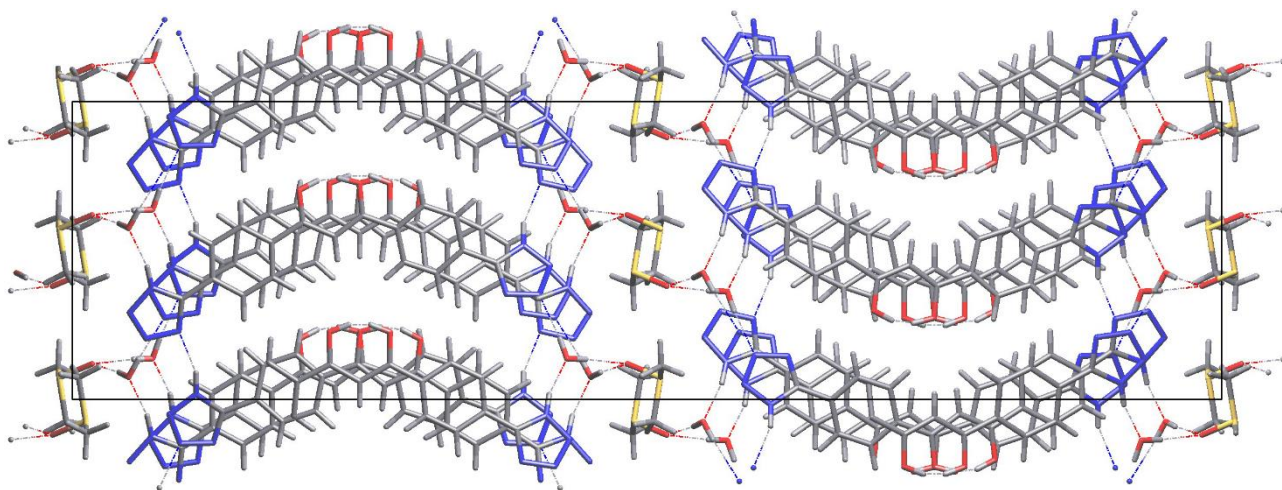

**Figure S11.** View along **a** of the packing in the crystal structure of  $3\text{H}_3\text{L}^1 \cdot 2\text{DMSO} \cdot 4\text{H}_2\text{O}$ .

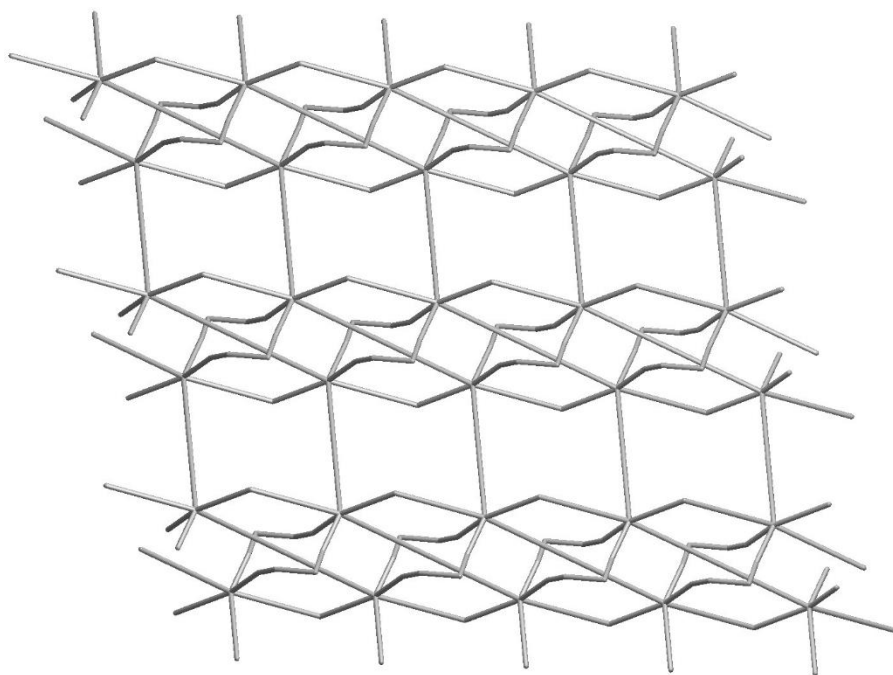

**Figure S12.** Simplified net of topological type (6,3)IIa for the crystal structure of  $[\text{NEt}_4][\text{Fe}(\text{HL}^1)_3] \cdot 3\text{THF}$  (**1**).
